RESEARCH ARTICLE

# Prevalence of stunting and its associated factors among children 6-59 months of age in Libo-Kemekem district, Northwest Ethiopia; A community based cross sectional study

Selamawit Bekele Geberselassie<sup>1</sup>, Solomon Mekonnen Abebe<sup>2</sup>, Yayehirad Alemu Melsew<sup>3</sup>, Shadrack Mulinge Mutuku<sup>4</sup>, Molla Mesele Wassie<sup>2\*</sup>

**1** Program Development Division, World Vision Ethiopia, Addis Abeba, Ethiopia, **2** Department of Human Nutrition, Institute of Public Health, College of Medicine and Health Sciences, University of Gondar, Gondar, Ethiopia, **3** Department of Epidemiology and Biostatistics, Institute of Public Health, College of Medicine and Health Sciences, University of Gondar, Gondar, Ethiopia, **4** Adelaide Medical School, Faculty of Health and Medical Sciences, University of Adelaide, Adelaide, Australia

\* [molmesele@gmail.com](mailto:molmesele@gmail.com)

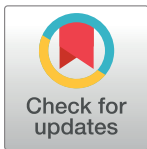

**OPEN ACCESS**

**Citation:** Geberselassie SB, Abebe SM, Melsew YA, Mutuku SM, Wassie MM (2018) Prevalence of stunting and its associated factors among children 6-59 months of age in Libo-Kemekem district, Northwest Ethiopia; A community based cross sectional study. *PLoS ONE* 13(5): e0195361. <https://doi.org/10.1371/journal.pone.0195361>

**Editor:** Michelle Louise Gatton, Queensland University of Technology, AUSTRALIA

**Received:** February 24, 2017

**Accepted:** March 21, 2018

**Published:** May 3, 2018

**Copyright:** © 2018 Geberselassie et al. This is an open access article distributed under the terms of the [Creative Commons Attribution License](https://creativecommons.org/licenses/by/4.0/), which permits unrestricted use, distribution, and reproduction in any medium, provided the original author and source are credited.

**Data Availability Statement:** All data underlying the study are within the paper and its Supporting Information files.

**Funding:** The thesis is supported by University of Gondar.

**Competing interests:** The authors have declared that no competing interests exist.

**Abbreviations:** AOR, Adjusted Odds Ratio; ARI, Acute respiratory infection; CBN, Community

## Abstract

### Background

Children in developing countries are highly vulnerable to impaired physical growth because of poor dietary intake, lack of appropriate care, and repeated infections. This study aimed at assessing the prevalence of stunting and associated factors among children 6–59 months of age in Libo-kemekem district, northwest Ethiopia.

### Methods

A community based cross sectional study was conducted in Libo-Kemekem from October 15 to December 15, 2015. The multistage sampling technique was employed to select 1,320 children aged 6-59 months. Data were collected by trained community health extension workers under regular supervision. Data were entered into EPI-Info version 3.5.1, and height for age was converted to Z-score with ENA-SMART software. Data were then exported to SPSS version 20 for descriptive and binary logistic regression analyses. The significance of associations was determined at  $p < 0.05$ .

### Results

Out of 1287 children included in the analysis, 49.4% (95% CI: 46.7%–52.3%) were found to be stunted. In the multivariate analysis, increased child age [AOR = 6.31, 95%CI: (3.65, 10.91)], family size of six and above [AOR = 1.77, 95%CI: (1.35, 2.32)] were positively associated with stunting, while, fathers with secondary school education [AOR = 0.50, 95%CI: (0.30, 0.81)], farmers as household heads [AOR = 0.56, 95%CI: (0.38, 0.84)] and self-employed parents as household head [AOR = 0.45, 95% CI: (0.28, 0.72)] were found to be preventive factors.

Based Nutrition; CI, Confidence Interval; CSA, Central Statistics Agency; COR, Crude Odds Ratio; ENA, Emergency Nutrition Assessment; EDHS, Ethiopian Demographic Health Data; SD, Standard deviation; SMART, Standardize Monitoring and assessment of Relief and Transition; SPSS, Statistical Package for Social Science; WHO, World Health Organization.

## Conclusion

The prevalence of stunting was high in the study area. We found that stunting was significantly correlated with child age, occupational status of household head, family size, and fathers' education. Therefore, intervention focusing on supporting housewives, family planning, and education on child feeding and nutrition should be implemented.

## Background

Stunting is defined as a height that is more than two standard deviations below the World Health Organization (WHO) child growth standard median [1, 2]. Stunting is considered as a severe public health problem in the community when its prevalence in children is greater than 40% [3]. It is a largely irreversible outcome of inadequate nutrition and repeated bouts of infection during the first 1000 days of the child's life [1, 4]. It has long term effects on individuals and societies, including diminished cognitive and physical development, reduced productive capacity, and poor health, and increased risk of degenerative diseases such as diabetes [[4, 5]. Furthermore, stunted children experienced rapid weight gain after 2 years have an increased risk of becoming overweight or obese later in life [4, 5].

Globally 161 million children under five were stunted in 2013 [6]. In 2015, Africa has the highest prevalence of stunting at 37.6%, followed by Asia at 22.9% [7]. According to the Ethiopian mini Demographic and Health Survey (EDHS) report 2014, stunting among children under five years of age is at 40%. In the Amhara National Regional State of Ethiopia stunting, wasting, and underweight is reported to be 40%, 10% and 33%, respectively [8].

Stunting can be caused by various factors such as parental, socio-demographic, and economic status, as well as cultural practices and environmental and other health related variables [9]. For instance, poverty, low parental education, lack of sanitation, low food intake, poor feeding practices, inadequate breastfeeding, repeated infections, family size and birth interval are regarded as key determinants of stunting [9–11]. Another study reported that family socio-economic status was the most important factor associated with stunting [12]. Similarly, other studies are in agreement that stunting is influenced by child age [13], age of the mother, child sex, family size, wealth index [13], maternal/paternal education, marital status of mother, and number of livestock of the family [10, 14–19]. Moreover, availability and utilization of health services and the care provided to the child were found to be other determinants of stunting [20].

The Ethiopian government recognizes stunting as a major public health problem and obstacle to its economic goals. Since stunting is greatly dependent on the local geo-cultural factors such as tradition and community livelihood, investigating its prevalence and causative factors within this context is important to prioritize development interventions to mitigate the problem. Therefore, the aim of this study was to determine the magnitude of stunting and identify its determinants among children aged less than five years in Libo-kemkem district, northwest Ethiopia.

## Methods

### Study design and setting

A community based cross sectional study was conducted in Libo-Kemkem district from October 15 to December 15, 2015, to determine the level of stunting among children 6–59 months

of age. The district has an area of 1,560 km<sup>2</sup> and is located at 11°57'46.6"-12°25'32.6N latitude and 37°34'48.9-38°3'30.9" E longitude. It comprises 34 villages of which 5 are urban. The district is located on black cotton clay soil and flat plain with relatively high temperature and high rainfall, with a mean of 1173mm rain per annum. Agricultural activities are restricted to a single rain season (from June to September). Maize, barley and millet are the main food crops, while rice, vetch, and chickpeas are the main cash crops. The total population of the district in 2010 was 198,951 of which 100,951 were males and 97,423 females. The district has a population density of 1948 per square km [21].

### Ethics approval

Ethical clearance was obtained from the Ethical Review Committee of the Institute of Public Health, College of Medicine and Health Sciences, the University of Gondar. Letters of permission were also obtained from the North Gondar Zonal Health Office and the Libo-kemekem District Administration. Informed consent obtained from each parent/care giver after the purpose of the study was explained. Confidentiality was ensured by using code numbers rather than names.

### Study population and sampling

The study population included children aged 6–59 months in the 12 randomly selected villages of the district, three urban and nine rural villages. Children who were seriously ill during the whole data collection season and children with spinal curvature (Kiphosis, scoliosis and kiphoscoliosis) were excluded. Out of 34 villages in the district, 12 were selected randomly. The total sample size ( $n = 1320$ ) was distributed to each village proportionally based on the number of households in the village, using probability proportionate to size method. The number of households in each village was obtained from the respective health posts. Sampling interval ( $K$ ) was calculated for each village, and the first household in each village was identified using a random number from  $k$  number of households. Then, systematic random sampling technique was used to select study participants from selected households for measurements. For households which had more than one eligible children, lottery method was used to select one child for the study. Mothers or care givers were interviewed on socio-demographic, economic, child health related characteristics and environmental conditions with a pre-tested structured questionnaire. Child morbidity status was asked in the previous 6 months as diagnosed by a health professional.

### Data collection and analysis

Data were collected by trained community health extension workers from October 15 to December 15, 2016. Mothers or care givers were interviewed and anthropometry measurement (height and weight) was taken on children.

Height of infants aged six months to 23 months was measured in a recumbent position to the nearest 0.1 cm, using a board with an upright wooden base and movable headpieces. Children aged 24 to 59 months were measured in a standing up position to the nearest of 0.1 cm. Additionally, child weight was measured by an electronic digital weight scale for children who were comfortable to be measured alone, and also for children who were uncomfortable to be measured alone, we used the combined mother and child weight and the mother's individual weight to calculate the child's weight [3]. Respondent economic status was accounted for through the occupational variables. The Categories of morbidity status were based on the types of diseases that the child encountered in the previous six months. For instance, if the child had one type of disease it will be categorized as one disease. Distance of water source from

household was categorized as near if it takes less than 30 minutes while far if it takes  $\geq 30$  minutes on foot.

The collected data underwent cleaning and entered using the EPI-INFO 3.5.1 software. Data on sex, age, height, and weight was transferred with participants' identification number to ENA for SMART software to convert nutritional data into Z scores of the indices HAZ using the WHO standard. The anthropometry measurement of height for age (HAZ) was calculated through ENA SMART software, and children less than -2 SD were classified as stunted. Those children with HFA indices between -2 and -3 SD were classified as moderate stunting while  $< -3$  SD were classified as severe stunting. Data was also exported to SPSS version 20 for further analysis and identification of factors associated with stunting by the binary logistic regression model. Variables with a p-value less than 0.2 in the bivariate analysis were included in the multivariate logistic regression model. The strength of association was determined by the Adjusted Odds Ratio (AOR) at a 95% confidence interval, and p-value  $< 0.05$  was used to show the association between independent variables and the presence of stunting. Variables having p-value, of  $< 0.05$  were considered as statistically significant.

## Results

### Demographic and socio-economic characteristics

In this study a total of 1287 children aged 6–59 months were included, with a response rate of 97.5%. The majority 1149 (86.9%) of the mothers were married, and 788 (61.2%) were within the age group of 26–35 years. With regard to parents educational status, 61.2% of the mothers and 47.6% of the father were illiterate. Out of the total households included, 649 (53.9%) family heads were farmers. (Table 1)

The children varied in terms of sex and age in that 665 (51.7%) were females, while 367 (28.5%) and 356 (27.7%) were 13–25, and 25–36 months old, respectively. Regarding child morbidity status, most of the children 948 (73.7%) had infectious diseases such as diarrhea caused by infectious agents for in the previous six months. (Table 2)

### Environmental health condition

The majority (71.3%) of the households used public tap water for drinking. Almost all, 1170 (90%), of the households had access to a nearby water source, whereas 117 (9.1%) are required to travel more than 30 minutes on foot to fetch water.

With regard to the availability of toilet, 745 (57.9%) households had toilettes; traditional pit latrines were most commonly used, whilst 529 (41.1%) households used open field defecation. (Table 3)

### Prevalence of stunting

The overall prevalence of stunting in the study population was 49.4% [95% CI: 46.7–52.3]. The prevalence of stunting was 52.3% among female children and 47.7% among males. The prevalence of moderate and severe stunting was 37.5% and 13.1%, respectively. Stunting was most prevalent in the 49–59 months age group at 65.5%, while the 6–12 months age group had the least. (Fig 1)

### Factor associated with stunting

Child age, family size, fathers educational status, occupational status of household head, child morbidity status, and marital status of parents were entered into the multivariate binary logistic regression model. The output of the multivariate binary logistic regression showed that,

**Table 1. Demographic and socio-economic characteristics of parents in Libo-kemekem district, northwest Ethiopia.**

| Characteristics                        | Category                      | Frequency | Percent (%) |
|----------------------------------------|-------------------------------|-----------|-------------|
| Age of the mother                      | 18–25                         | 278       | 21.6        |
|                                        | 26–35                         | 788       | 61.2        |
|                                        | 36 and above                  | 221       | 17.2        |
| Marital status*                        | Single                        | 43        | 3.3         |
|                                        | Married                       | 1149      | 86.9        |
|                                        | Divorced, Widow and separated | 125       | 9.7         |
| Husband education                      | Cannot read & write           | 612       | 47.6        |
|                                        | Primary education             | 432       | 33.6        |
|                                        | Secondary education           | 111       | 8.6         |
|                                        | Tertiary education            | 132       | 10.3        |
| Maternal education                     | Cannot read & write           | 788       | 61.2        |
|                                        | Primary education             | 309       | 24.0        |
|                                        | Secondary education           | 104       | 8.1         |
|                                        | Tertiary education            | 86        | 6.7         |
| Occupational status of head of the HHs | House wife                    | 237       | 18.4        |
|                                        | Farmer                        | 694       | 53.9        |
|                                        | Merchant                      | 115       | 8.9         |
|                                        | Government employee           | 66        | 5.1         |
|                                        | Self-employee                 | 175       | 13.6        |

\*n is not 1,287.

<https://doi.org/10.1371/journal.pone.0195361.t001>

child age, family size, fathers educational, and occupational status were significantly associated with stunting. (Table 4)

Age of a child was directly correlated with stunting. Accordingly, compared to children aged 6–12 months, children of age 13–24 months were 2.07 times more likely to be stunted [AOR = 2.07, 95% CI: (1.34, 3.18)]. Similarly, children aged 25–36 months had 3.86 times more odds of being stunted than children aged 6–12 months [AOR = 3.86, 95% CI: (2.50, 5.97)]. Thus older children had a stronger association with stunting. Children aged 37–48 months were 4.73 times [AOR = 4.73, 95% CI: (3.00, 10.91)] more stunted while children aged 49–59 months were 6.31 times more likely to be stunted compared to children aged 6–12 months [AOR = 6.31, 95% CI: (3.65, 10.91)].

**Table 2. Children health and characteristics at Libo-kemekem district, northwest Ethiopia.**

| Characteristics   | Category             | Frequency | percent |
|-------------------|----------------------|-----------|---------|
| Sex of child      | Male                 | 622       | 48.3    |
|                   | Female               | 665       | 51.7    |
| Age of child      | 0–12                 | 159       | 12.4    |
|                   | 13–24                | 367       | 28.5    |
|                   | 25–36                | 356       | 27.7    |
|                   | 37–48                | 284       | 22.1    |
|                   | 49–59                | 121       | 9.4     |
| Morbidity status* | Only 1 disease       | 138       | 10.7    |
|                   | Only 2 diseases      | 948       | 73.7    |
|                   | 3 and above diseases | 201       | 15.6    |

\* The categories of morbidity status were based on the types of diseases that the child encountered in the previous six months.

<https://doi.org/10.1371/journal.pone.0195361.t002>

**Table 3. Environmental health conditions of households in Libo-kemekem district, northwest Ethiopia.**

| Characteristics          | Category   | Frequency | Percent |
|--------------------------|------------|-----------|---------|
| Availability of toilet*  | Yes        | 745       | 57.9    |
|                          | No         | 529       | 41.1    |
| Source of water*         | River      | 156       | 12.1    |
|                          | Spring     | 62        | 4.8     |
|                          | Public tab | 917       | 71.3    |
|                          | Others     | 74        | 5.7     |
| Distance of water source | Near       | 1170      | 90.9    |
|                          | Far        | 117       | 9.1     |

\*n is not 1287.

<https://doi.org/10.1371/journal.pone.0195361.t003>

Family size had also shown a positive significant association with stunting. Children in a family of at least six members were 1.77 times at higher odds of stunting than children in a family of five and less [AOR = 1.77, 95%CI: (1.35, 2.32)].

Reduction in the odds of stunting was observed among children who lived with their fathers and whose parents were farmers and self-employed. Children whose fathers completed secondary school education had shown 50% reduced odds of being stunted compared to children with illiterate fathers [AOR = 0.50, 95%CI: (0.30, 0.81)]. Similarly, farmers and self-employed household heads reduced the odds of their children compared to housewife heads. As a result children of farmer household heads had 44% lower odds of being stunted [AOR = 0.56, 95% CI: (0.38, 0.84)] than children of housewives. Similarly, children from self-employed household heads had 55% lower odds of stunting than housewives [AOR = 0.45, 95% CI: (0.28, 0.72)].

### Discussion

This study has explored the prevalence of stunting and its associated factors among children aged 6–59 months at Libo-kemekem district, North West Ethiopia. The prevalence of stunting was 49.4%, of this 47.3% in males and 50.3% in females. This finding was the highest compared

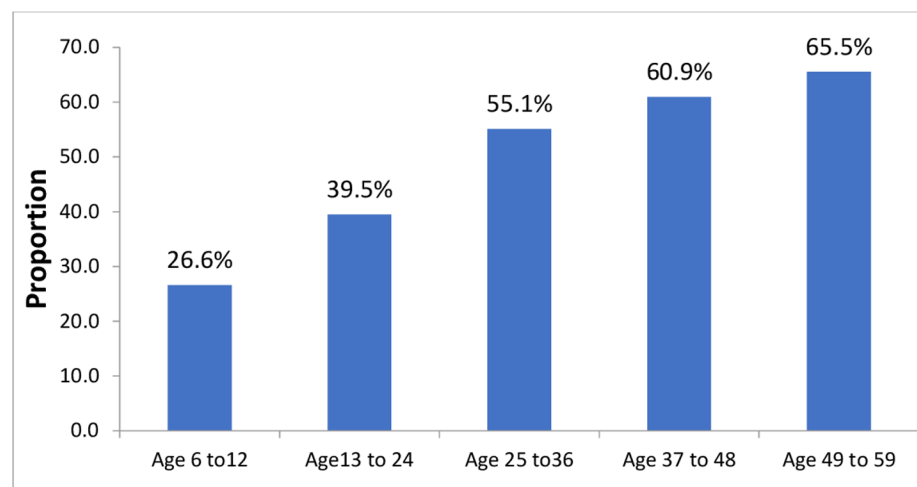

**Fig 1. Prevalence of stunting by age (in months) among children aged 6–59 months at Libo-kemekem district, northwest Ethiopia.**

<https://doi.org/10.1371/journal.pone.0195361.g001>

**Table 4. Binary logistic regression analysis output for factors associated with stunting among children age 6-59months, in Libo-kemekem district, northwest Ethiopia.**

| Variables                                    | Stunting |     | Crude OR (95% CI)   | Adjusted OR (95% CI) |
|----------------------------------------------|----------|-----|---------------------|----------------------|
|                                              | Yes      | No  |                     |                      |
| <b>Morbidity</b>                             |          |     |                     |                      |
| Only Diarrhea                                | 64       | 73  | 1                   | 1                    |
| Diarrhea & ARI                               | 439      | 496 | 1.010(0.705,1.446)  | 0.84(0.57,1.25)      |
| Diarrhea,ARI & other diseases                | 125      | 75  | 1,901(1.223,2.955)  | 1.46(0.90,2.36)      |
| <b>Age of child</b>                          |          |     |                     |                      |
| 6–12 months                                  | 42       | 116 | 1                   | 1                    |
| 13–24 months                                 | 143      | 219 | 1.803 (1.196,2.720) | 2.07(1.34,3.18)*     |
| 25–36 months                                 | 195      | 159 | 3.387(2,247,5,106)  | 3.86(2.50,5.97)*     |
| 37–48 months                                 | 170      | 109 | 4.308(2,810,6,603)  | 4.73(3.00,10.91)*    |
| 49–59 months                                 | 78       | 41  | 5.254(3.132,8,813)  | 6.31(3.65,10.91)*    |
| <b>Number of family size</b>                 |          |     |                     |                      |
| Less than and equal to 5                     | 346      | 450 | 1                   | 1                    |
| 6 and above                                  | 282      | 194 | 1.891(1.502,2.380)  | 1.77(1.35,2.32)*     |
| <b>Marital status</b>                        |          |     |                     |                      |
| Single                                       | 25       | 18  | 1                   | 1                    |
| Married                                      | 541      | 564 | 0.691(0.373,1.280)  | 0.62(0.32,1.23)      |
| Divorced, separated and widowed              | 62       | 62  | 0.720(0.357,1.451)  | 0.94(0.43,2.03)      |
| <b>Father's educational status</b>           |          |     |                     |                      |
| Cannot read and write                        | 336      | 266 | 1                   | 1                    |
| Primary education (1–8)                      | 200      | 227 | 0.698(0.544,0.895)  | 0.75(0.57,1.00)      |
| Secondary education (9–12)                   | 38       | 73  | 0.412(0.270,0.630)  | 0.50(0.30,0.81)*     |
| College and above                            | 54       | 78  | 0.548(0.374,0.803)  | 0.63(0.36,1.11)      |
| <b>Occupational status of household head</b> |          |     |                     |                      |
| House wife                                   | 125      | 110 | 1                   | 1                    |
| Farmer                                       | 348      | 334 | 0.917(0.681,1.234)  | 0.56(0.38,0.84)*     |
| Merchant                                     | 55       | 60  | 0.807(0.516,1.265)  | 0.67(0.41,1.10)      |
| Government employed                          | 25       | 41  | 0.537(0.307,0.939)  | 0.68(0.34,1.37)      |
| Self-employed                                | 99       | 75  | 0.667(0.449,0.989)  | 0.45(0.28,0.72)*     |

\*Statistically significant at p-value less than 0.05

<https://doi.org/10.1371/journal.pone.0195361.t004>

to the regional, national and WHO cut off point of 40% set for stunting [8, 22]. The current magnitude was also higher compared to that of Kenyan study which was 39% [23] and other study conducted in eastern Ethiopia which showed prevalence of 34.4% [24, 25]. Similarly, it was higher than those of studies conducted in southwest Ethiopia, which was 35.4% [26]. A studies in Libo-kemekem and Fogera districts of northwest Ethiopia, and Haramaya district of eastern Ethiopia reported a higher prevalence of 42.7% [27] and 45.8% [28] stunting among school age children, respectively.

Our findings might vary in part from previous ones due to differences in geographic characteristics of the study area [23–25], study period, age difference of the study participants [27] (i.e. 0–59 and 6–59 months) and other socio-economic characteristics of the participants. Higher prevalence of infectious diseases like malaria and Visceral leishmaniosis and micronutrient deficiencies in Libo-kemekem district with inadequate health care may contribute higher occurrences of child stunting in our study subjects [29, 30]. However, the magnitude of stunting in the study area is much higher compared to the national recommendations and efforts to



alleviate the problem. For example, the prevalence is consistent with the 2005 national report [31]; however, there have been improvements over that time as reported in 2014 [8].

Also this study showed that the prevalence of stunting increases with the age of the child. This association was supported by other studies in north and northwest Ethiopia [27, 32]. This might be due to the nutritional status of the mother since stunting has a chronic and cyclic nature, poor dietary practice, weaning, lower and inappropriate breast and complementary feeding practices. The other possible explanation for increased risk of stunting in older children may be due to unhygienic preparation of complementary foods which exposes children to recurrent infections. Limited access to safe drinking water in the study area also exposes these children to varied types of infections and diarrheal diseases which further increase the risk of chronic malnutrition.

Our results shows that, education is the key resource that enabled women and men to provide appropriate childcare with regard to health, child feeding and child education. Completion of secondary education of the father was observed to ameliorate the prevalence of stunting among the study participants. These associations were not observed in those completed primary education and may be due to the fact that life science courses are not integrated with nutrition education and communication. Similar associations were seen in studies conducted in Bangladesh and the Philippines [33, 34]. This is because in the study area fathers who are educated better than their wife's as, household heads have control over family expenditures. Thus, they have a leading role in providing quality health care and optimal feeding for their children. Therefore, if the father is educated, he is more knowledgeable in childcare as well as optimal child feeding recommendations and can advise the mother on children's nutritional requirements.

On the other hand, this study identified that as family size increases, so to do the odds of being stunted. Children from families with six and more members had a higher odds of being stunted compared to children from five or less family members. This finding is supported by another study conducted in southeast Ethiopia which stated that children whose mothers gave birth to more than four children were more likely to be stunted compared to children from mothers who gave birth to one child [14]. This could be due to the fact that, families with more children are more stretched economically and cannot feed themselves well and face difficulty in providing the daily nutrition requirements for proper child physical development. This means, as the size of a family increases there is a scarcity of resources for household consumption, especially food, and healthcare which ultimately leads to stunted growth. Furthermore, parents with more children generally lack adequate time to pay proper attention to the need of each child.

The occupational status of the household head also has a significant role in a child's stunting. Households headed by farmers and self-employed parents reduced the odds of stunting among their children compared to households led by housewives. This is because the income earned by a single parent (a mothers) is always often less than what couples can procure.

The study has the following limitations. We cannot declare a temporal relationship between stunting and other independent variables due to the cross sectional design of the study. Standard procedures were used for the measurement of height/length but measurement errors are inevitable especially within assessors. Moreover, there may be a recall bias in reporting age of children in a rural villages.

## Conclusion

Our findings demonstrate a higher prevalence of stunting in Libo-kemkem district and thus represents an important public health concern. This study also revealed that a child's age,



occupational status of the household head, family size, and fathers' education were significantly associated factors for stunting. Therefore, a strong nutrition specific and sensitive intervention should be implemented in the study area with a special focus on supporting housewives, promoting family planning, and education on child feeding and nutrition.

## Supporting information

### S1 Dataset. Metadata.

(DTA)

## Acknowledgments

We would like to thank the Institute of Public Health, the University of Gondar, Libo-kemekem District Health Office for their support. We are also grateful to the study participants.

## Author Contributions

**Conceptualization:** Selamawit Bekele Geberselassie, Solomon Mekonnen Abebe, Molla Mesele Wassie.

**Data curation:** Selamawit Bekele Geberselassie.

**Formal analysis:** Selamawit Bekele Geberselassie, Solomon Mekonnen Abebe.

**Investigation:** Selamawit Bekele Geberselassie, Molla Mesele Wassie.

**Methodology:** Selamawit Bekele Geberselassie, Solomon Mekonnen Abebe, Yayehirad Alemu Melsew, Molla Mesele Wassie.

**Project administration:** Selamawit Bekele Geberselassie, Molla Mesele Wassie.

**Resources:** Molla Mesele Wassie.

**Software:** Yayehirad Alemu Melsew, Molla Mesele Wassie.

**Supervision:** Solomon Mekonnen Abebe, Molla Mesele Wassie.

**Validation:** Solomon Mekonnen Abebe, Shadrack Mulinge Mutuku.

**Writing – original draft:** Molla Mesele Wassie.

**Writing – review & editing:** Solomon Mekonnen Abebe, Yayehirad Alemu Melsew, Shadrack Mulinge Mutuku, Molla Mesele Wassie.

## References

1. World Health Organization. Child Growth Standards: Length/height-for-age, weight-for-age, weight-for-length, weight-for-height and body mass index-for-age: Methods and development. Geneva WHO, 2006.
2. World Health Organization: Child growth standards Anthro and macro: WHO; 2011.
3. World Health Organization. Physical status: The use and interpretation of anthropometry: report of a WHO expert committee Geneva WHO; 1995.
4. Black RE, Allen LH, Bhutta ZA, Caulfield LE, de Onis M, Ezzati M, et al. Maternal and child undernutrition 1—Maternal and child undernutrition: global and regional exposures and health consequences. *Lancet*. 2008; 371(9608):243–60. doi: [10.1016/S0140-6736\(07\)61690-0](https://doi.org/10.1016/S0140-6736(07)61690-0). WOS:000252471900028. PMID: [18207566](https://pubmed.ncbi.nlm.nih.gov/18207566/)
5. Dewey K, Begum K. Long-term consequences of stunting in early life. *Maternal & child nutrition*. 2011; 7(s3):5–18.
6. de Onis M, Branca F. Childhood stunting: a global perspective. *Matern Child Nutr*. 2016; 12 Suppl 1:12–26. <https://doi.org/10.1111/mcn.12231> PMID: [27187907](https://pubmed.ncbi.nlm.nih.gov/27187907/); PubMed Central PMCID: [PMC5084763](https://pubmed.ncbi.nlm.nih.gov/PMC5084763/).

7. de Onis M, Blossner M, Borghi E. Prevalence and trends of stunting among pre-school children, 1990–2020. *Public Health Nutr.* 2012; 15(1):142–8. <https://doi.org/10.1017/S1368980011001315> PMID: 21752311.
8. CSA. Ethiopia Mini Demographic and Health Survey 2014. Central Statistical Agency Addis Ababa, Ethiopia. 2014.
9. UNICEF. Focus on nutrition: The state of the world's children Oxford and Nework: UNICEF, 1998.
10. Mengistu K, Alemu K, Destaw B. Prevalence of Malnutrition and Associated Factors Among Children Aged 6–59 Months at Hidabu Abote District, North Shewa, Oromia Regional State. *Nutritional Disorders & Therapy* 2013.
11. Gelano T, Birhan N, Mekonnen M. Prevalence of under nutrition and its associated factors among under five children in Gondar city, Northwest Ethiopia. *Journal Of Harmonized Research in Medical & Health Sci* 2015; 2(4):163–74.
12. Ruwali D. Nutritional Status of Children Under Five Years of Age and Factors Associated in Padampur VDC, Chitwan. *Health Prospect.* 2011; 10(14–8).
13. Derso T, Tariku A, Biks GA, Wassie MM. Stunting, wasting and associated factors among children aged 6–24 months in Dabat health and demographic surveillance system site: A community based cross-sectional study in Ethiopia. *BMC Pediatr.* 2017; 17(1):96. <https://doi.org/10.1186/s12887-017-0848-2> PMID: 28376746; PubMed Central PMCID: PMC5379504.
14. Asfaw M, Wondaferash M, Taha M, Dube L. Prevalence of undernutrition and associated factors among children aged between six to fifty nine months in Bule Hora district, South Ethiopia. *BMC Public Health.* 2015; 15:41. <https://doi.org/10.1186/s12889-015-1370-9> PMID: 25636688; PubMed Central PMCID: PMC4314803.
15. Megabiaw B, Rahman A. Prevalence and Determinants of Chronic Malnutrition Among Under-5 Children in Ethiopia. *International Journal of Child Health and Nutrition.* 2013; 2(3):230–6.
16. Rajalakshmi J, Endazenaw G. Assesment of Nutritional Status among Under-Five Children in Bishoftu town, Oromiya Region, Ethiopia. *International Journal of Nursing Didactics.* 2015;; 15(11):10–2.
17. Yalew B. Prevalence of Malnutrition and Associated Factors among Children Age 6–59 Months at Lalibela Town Administration, North WolloZone, Anrs, Northern Ethiopia. *J Nutr Disorders Ther* 2014; 4:132.
18. Ali W, Ayub A, Hussain H. Prevalance and associated risk factors of under nutrition among children aged 6 to 59 months in linternally displaced persons of Jalazoil camp, district Nowshera, Khyber Pakhtunkhwa. *JOURNAL OF AYUB MEDICAL COLLEGE, ABBOTTABAD.* 2015; 27(3):556–9. <https://www.ncbi.nlm.nih.gov/pubmed/26721006>. PMID: 26721006
19. Kadima YE. Factors influencing malnutrition among children under age of five age in Kweneng West District of Botswana: University of South Africa; 2012.
20. WHO. Global nutrition report 2015; actions and accountability to advance nutrition & sustainable developmen. 2015.
21. CSA. Population and Housing Census Report at National Level. Addis Ababa, Ethiopia. 2010. [www.csa.gov.et/newcsaweb/images/documents/pdf\\_files/regional/report.pdf](http://www.csa.gov.et/newcsaweb/images/documents/pdf_files/regional/report.pdf).
22. World Health Organization. Global Nutrition Targets 2025 Stunting Policy Brief (WHO/NMH/NHD/14.3). Geneva: WHO, 2014.
23. Mutua N, Onyango D, Wakoli A, Mueni H. Factors associated with increase in undernutrition among children aged 6–59 months in kamoriongo village, nandi county, kenya. *International Journal of Academic Research and Reflection* 2015; 3(2).
24. Demissie S, Worku A. Magnitude and factors associated with malnutrition in children 6–59 months of age in pastoral community of Dollo Ado district, Somali region, Ethiopia. *Science Journal of Public Health* 2013; 1(4):175–83.
25. Sisay Z. Magnitude and factors associated with malnutrition of children under five years of age in rural Kebeles of Haramaya, Ethiopia. *Harar Bull Health Sci Extracts.* 2012; 4.
26. Ayalew E. The prevalence of stunting and associated factors among children age 6–59 months at Mizan-Aman Town, Bench Maji zone, SNNPR region, Ethiopia. Addis Abeba University 2015.
27. Herrador Z, Sordo L, Gadisa E, Moreno J, Nieto J, Benito A, et al. Cross-sectional study of malnutrition and associated factors among school aged children in rural and urban settings of Fogera and Libo Kemkem districts, Ethiopia. *PLoS One.* 2014; 9(9):e105880. <https://doi.org/10.1371/journal.pone.0105880> PMID: 25265481; PubMed Central PMCID: PMC4179248.
28. Yisak H, Gobena T, Mesfin F. Prevalence and risk factors for under nutrition among children under five at Haramaya district, Eastern Ethiopia. *BMC Pediatr.* 2015; 15:212. <https://doi.org/10.1186/s12887-015-0535-0> PMID: 26675579; PubMed Central PMCID: PMC4682239.

29. Herrador Z, Sordo L, Gadisa E, Buno A, Gomez-Rioja R, Iturzaeta JM, et al. Micronutrient deficiencies and related factors in school-aged children in Ethiopia: a cross-sectional study in Libo Kemkem and Fogera districts, Amhara Regional State. *PLoS One*. 2014; 9(12):e112858. <https://doi.org/10.1371/journal.pone.0112858> PMID: 25546056; PubMed Central PMCID: PMC4278675.
30. Lopez-Perea N, Sordo L, Gadisa E, Cruz I, Hailu T, Moreno J, et al. Knowledge, attitudes and practices related to visceral leishmaniasis in rural communities of Amhara State: a longitudinal study in northwest Ethiopia. *PLoS Negl Trop Dis*. 2014; 8(4):e2799. <https://doi.org/10.1371/journal.pntd.0002799> PMID: 24743328; PubMed Central PMCID: PMC3990515.
31. CSA. Ethiopia Demographic and Health Survey Calverton, Maryland, USA Central Statistical Agency, Addis Ababa, Ethiopia 2005.
32. Afework M, Fitsum H, Gideon K. Factors Contributing to Child Malnutrition in Tigray, Northern Ethiopia. 2005; 1(7).
33. Jamro B, Junejo A, Lal S, Bouk G, Jamro S. Risk factors for severe acute malnutrition in children under the age of five year in Sukkur. *Pakistan Journal of Medical Research*. 2012; 51(4):111.
34. Islam MM, Alam M, Tariqzaman M, Kabir MA, Pervin R, Begum M, et al. Predictors of the number of under-five malnourished children in Bangladesh: application of the generalized poisson regression model. *BMC Public Health*. 2013; 13(11):11. <https://doi.org/10.1186/1471-2458-13-11> PMID: 23297699; PubMed Central PMCID: PMC3599578.
